# Supplementary material for: An AIE-active type I photosensitizer based on N,N′-diphenyl-dihydrophenazine for high-performance photodynamic therapy under hypoxia
Source: Royal Society of Chemistry journal article supplement (doi:10.1039/d3qm00215b), 2023-01-01
Supplement: d3qm00215b1.pdf [file d3qm00215b1.pdf]

**An AIE-active type I photosensitizer based on *N, N'*-diphenyl-dihydrophenazine for high-performance photodynamic therapy under hypoxia**

Sifan Li,<sup>a</sup> Xin Jin,<sup>a</sup> Zhiyun Zhang,<sup>\*a</sup> Jing Li<sup>a</sup> and Jianli Hua<sup>\*a</sup>

<sup>a</sup>Key Laboratory for Advanced Materials, Joint International Research Laboratory for Precision Chemistry, School of Chemistry and Molecular Engineering, East China University of Science and Technology, 130 Meilong Road, Shanghai 200237, PR China. E-mail: [zhangzhiyun@ecust.edu.cn](mailto:zhangzhiyun@ecust.edu.cn); [jlhua@ecust.edu.cn](mailto:jlhua@ecust.edu.cn)

## Contents

|                                                                                                             |    |
|-------------------------------------------------------------------------------------------------------------|----|
| Reagents and Measurements.....                                                                              | 3  |
| Preparation of <b>DMPpy</b> , <b>DPpy</b> , <b>DMPSI</b> and <b>DMPpy-PF<sub>6</sub></b><br>Molecules ..... | 3  |
| Fluorescence Quantum Yield Measurement .....                                                                | 5  |
| Reactive Oxygen Species Generation Measurement <i>in</i><br><i>vitro</i> .....                              | 6  |
| Theoretical Calculation.....                                                                                | 7  |
| Cell Culture .....                                                                                          | 7  |
| Cellular Imaging.....                                                                                       | 7  |
| Cytotoxicity of DMPpy in Cells under Normoxia and<br>Hypoxia .....                                          | 8  |
| Intracellular ROS Detection. ....                                                                           | 9  |
| Intracellular O <sub>2</sub> <sup>-</sup> Detection. ....                                                   | 9  |
| Calcein-AM/PI Staining of Hela Cells. ....                                                                  | 9  |
| Biological Experiments .....                                                                                | 14 |
| Original Spectral Copy of New Compounds .....                                                               | 19 |

## Reagents and Measurements

1, 4-dimethylpyridin-1-ium iodide, tetrahydrofuran (THF), 3-(2,3,3-trimethyl-3H-indol-1-ium-1-yl) propane-1-sulfonate, dichloromethane, piperidine, acetic acid were all purchased from Energy Chemical. All reagents were bought from commercial sources (Energy Chemical, Sigma-Aldrich, Adamas-beta) and used without further processing. All solvents were purified and dried before using by standard methods. The solvents used in spectrum analysis were of HPLC grade. The solutions for analytical studies were prepared with deionized water treated using a Milli-Q System (Billerica, MA, USA). Hecho S5000 LED cold-light fountain provides the white light irradiation. The synthesis of the compound **DMP-CHO** and **DP-CHO** were prepared as reported in the literature<sup>1</sup> and the synthetic routes of **DMPpy** and **DMPSI** were similar to **DPpy**.

## Preparation of **DMPpy**, **DPpy**, **DMPSI** and **DMPpy-PF<sub>6</sub>** molecules

### Scheme S1 Synthesis routes of **DMPpy**, **DPpy**, **DMPSI**, and **DPSI**

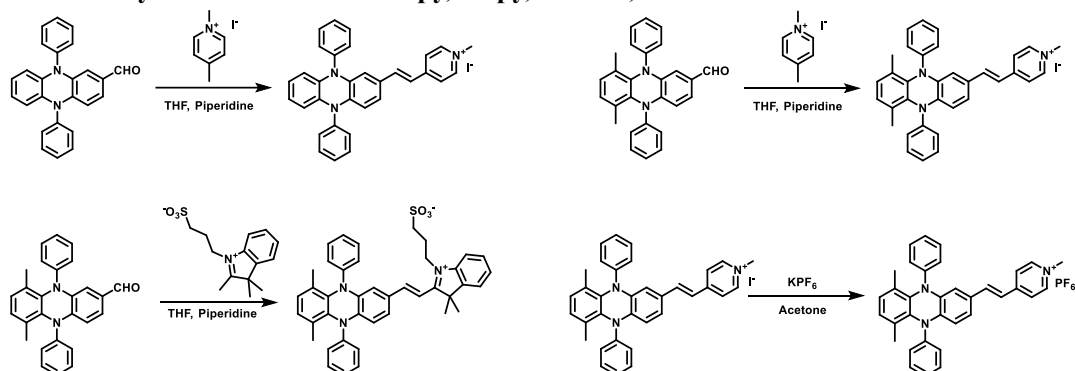

**Synthesis of **DMPpy** and **DPpy**.** These compounds are prepared from **DMP-CHO** and **DP-CHO** (100 mg, 0.256 mmol), 1,4-dimethylpyridin-1-ium iodide (60 mg, 0.256 mmol) and 2 drops piperidine were dissolved in 10mL THF in the flask under nitrogen atmosphere at 70 °C After 8 hours of reflux, the reaction was complete. After filtered and spin-dried, the crude product was separated by silica column with DCM/EtOH (v:v = 10:1).

(*E*)-4-(2-(6,9-dimethyl-5,10-diphenyl-5,10-dihydrophenazin-2-yl)vinyl)-1-methylpyridin-1-ium (**DMPpy**): Yield = 32.2%. <sup>1</sup>H NMR (400 MHz, DMSO-d<sub>6</sub>) δ 8.87 (d, *J* = 6.6 Hz, 2H), 8.22 (d, *J* = 6.5 Hz, 2H), 8.10 (d, *J* = 16.2 Hz, 1H), 8.05 (s, 1H), 7.77 (d, *J* = 8.4 Hz, 1H), 7.70 – 7.66 (m, 1H), 7.63 (d, *J* = 16.3 Hz, 1H), 7.19 (q, *J* =

8.5 Hz, 4H), 7.11 (q,  $J = 7.9$  Hz, 2H), 7.03 (d,  $J = 7.9$  Hz, 2H), 6.98 – 6.92 (m, 3H), 6.88 (t,  $J = 7.2$  Hz, 1H), 4.26 (s, 3H), 2.13 (s, 3H), 1.99 (s, 3H).  $^{13}\text{C}$  NMR (151 MHz, DMSO)  $\delta$  151.91, 146.05, 144.98, 144.46, 142.19, 140.35, 139.45, 139.22, 131.41, 130.27, 128.55, 127.63, 126.82, 125.45, 125.10, 124.69, 122.81, 122.37, 121.92, 120.80, 118.46, 115.89, 46.35, 43.14, 21.58, 20.96, 17.29, 16.72. HRMS ESI (m/z).  $[\text{M}]^+$ : calcd. for  $\text{C}_{34}\text{H}_{30}\text{N}_3$  480.2434; Found, 480.2430.

*(E)-4-(2-(5,10-diphenyl-5,10-dihydrophenazin-2-yl)vinyl)-1-methylpyridin-1-ium*

**(DPPy)**: Yield = 45.1%.  $^1\text{H}$  NMR (400 MHz, DMSO- $d_6$ )  $\delta$  8.71 – 8.60 (m, 2H), 7.99 (d,  $J = 5.2$  Hz, 2H), 7.75 (q,  $J = 8.0$  Hz, 4H), 7.60 (q,  $J = 7.3$  Hz, 2H), 7.48 (t,  $J = 7.1$  Hz, 5H), 6.78 (d,  $J = 9.0$  Hz, 1H), 6.65 (s, 1H), 6.33 – 6.29 (m, 2H), 5.76 (s, 1H), 5.55 (d,  $J = 8.3$  Hz, 1H), 5.51 (d,  $J = 5.6$  Hz, 1H), 5.47 (d,  $J = 7.2$  Hz, 1H), 5.32 (t,  $J = 4.6$  Hz, 1H), 4.14 (s, 3H).  $^{13}\text{C}$  NMR (151 MHz,  $\text{CDCl}_3$ )  $\delta$  144.14, 133.32, 131.97, 131.65, 130.30, 129.07, 128.96, 128.28, 125.62, 124.79, 124.39, 123.49, 122.72, 47.73. HRMS ESI (m/z)  $[\text{M}]^+$ : calcd. for  $\text{C}_{32}\text{H}_{26}\text{N}_3$  452.2121; Found, 452.2126.

**Synthesis of DMPSI.** DMPSI was prepared from **DMP-CHO** (100 mg, 0.256 mmol), 3-(2,3,3-trimethyl-3H-indol-1-ium-1-yl)propane-1-sulfonate (72 mg, 0.256 mmol) and 2 drops piperidine were dissolved in 10mL THF in the flask under nitrogen atmosphere at 70 °C. After 8 hours of reflux, the reaction was complete. After filtered and spin-dried, the crude product was separated by silica column with DCM/ EtOH (v:v = 10:1).

*(E)-3-(2-(2-(6,9-dimethyl-5,10-diphenyl-5,10-dihydrophenazin-2-yl)vinyl)-3,3-dimethyl-3H-indol-1-ium-1-yl)propane-1-sulfonate (DMPSI)*: Yield = 10.8%.  $^1\text{H}$  NMR (400 MHz, DMSO- $d_6$ )  $\delta$  8.56 (d,  $J = 16.2$  Hz, 2H), 8.31 (dd,  $J = 8.6, 1.5$  Hz, 1H), 8.03 – 8.00 (m, 1H), 7.96 – 7.86 (m, 2H), 7.68 (d,  $J = 8.4$  Hz, 1H), 7.62 (td,  $J = 4.5, 1.9$  Hz, 2H), 7.34 – 7.29 (m, 2H), 7.26 – 7.19 (m, 5H), 7.14 – 7.02 (m, 6H), 6.92 (t,  $J = 7.2$  Hz, 1H), 4.89 (t,  $J = 7.5$  Hz, 2H), 2.24 – 2.17 (m, 2H), 2.16 – 2.14 (m, 3H), 2.02 – 1.96 (m, 2H), 1.87 (s, 3H), 1.84 (s, 6H).  $^{13}\text{C}$  NMR (151 MHz,  $\text{CD}_2\text{Cl}_2$ )  $\delta$  184.92, 156.79, 152.26, 150.80, 147.94, 147.11, 144.35, 144.17, 143.90, 142.02, 135.42, 133.96, 132.80, 132.74, 132.66, 132.53, 132.43, 132.38, 132.15, 130.44, 127.67, 126.29, 125.89,

125.62, 124.96, 120.31, 118.34, 114.95, 59.35, 58.18, 55.41, 50.46, 48.72, 43.36, 43.24, 43.10, 42.97, 42.83, 42.69, 42.55, 42.41, 29.06, 27.98, 21.94, 21.84, 20.55, 14.54. HRMS ESI (m/z) [M+Na]<sup>+</sup>: calcd. for C<sub>41</sub>H<sub>39</sub>N<sub>3</sub>O<sub>3</sub>SNa 676.2610; Found, 676.2600.

**Synthesis of DMPpy-PF<sub>6</sub>.** DMPpy (100 mg, 0.165 mmol) was dissolved in 10 ml acetone. Then 5 ml of saturated solution of potassium hexafluorophosphate (KPF<sub>6</sub>) was added in the solution at 40-50 °C. After 8 hours of reflux, the reaction was complete. After filtered and spin-dried, the crude product was washed three times with deionized water to remove KPF<sub>6</sub> to give a brown solid **DMPpy-PF<sub>6</sub>**.

*(E)-4-(2-(6,9-dimethyl-5,10-diphenyl-5,10-dihydrophenazin-2-yl)vinyl)-1-methylpyridin-1-ium hexafluorophosphate (DMPpy-PF<sub>6</sub>):* Yield = 98%. <sup>1</sup>H NMR (400 MHz, CD<sub>3</sub>CN) δ 8.44 (d, *J* = 6.8 Hz, 2H), 8.01 (d, *J* = 6.8 Hz, 2H), 7.98 (d, *J* = 1.8 Hz, 1H), 7.88 (d, *J* = 16.4 Hz, 1H), 7.72 (d, *J* = 8.3 Hz, 1H), 7.65 (dd, *J* = 8.3, 1.9 Hz, 1H), 7.41 (d, *J* = 16.4 Hz, 1H), 7.19 – 7.10 (m, 6H), 7.00 (d, *J* = 7.8 Hz, 2H), 6.95 (d, *J* = 7.9 Hz, 2H), 6.90 (d, *J* = 7.3 Hz, 1H), 6.86 (t, *J* = 7.3 Hz, 1H), 4.19 (s, 3H), 2.19 (s, 3H), 2.06 (s, 3H). <sup>13</sup>C NMR (151 MHz, CD<sub>3</sub>CN) δ 154.11, 147.49, 147.18, 146.46, 145.32, 144.20, 141.96, 141.27, 141.06, 133.41, 132.64, 132.45, 129.68, 128.94, 128.25, 126.94, 126.64, 124.33, 123.18, 122.80, 121.84, 118.82, 116.67, 47.80, 17.89, 17.37. HRMS ESI (m/z). [M]<sup>+</sup>: calcd. for C<sub>34</sub>H<sub>30</sub>N<sub>3</sub> 480.2434; Found, 480.2442.

### Fluorescence Quantum Yield Measurement

The fluorescence quantum yield ( $\eta$ ) of titled compounds in aqueous medium was determined using a fluorescence comparison protocol. Freshly prepared Rhodamine 6G (RDM 6G) was used as standard ( $\eta = 0.95$  in water).<sup>2</sup> Firstly, the absorption spectra of titled compounds and RDM 6G in water were recorded by a spectrometer (Shimadzu RF-6000). Secondly, the photoluminescence spectra of the corresponding samples were measured by a fluorescence spectrometer at the same excitation wavelength. The photoluminescence intensities were calculated by wavelength integration. The  $\eta$  value of titled compounds was finally calculated by the following equation:

$$\eta_1 = \eta_0 \frac{A_0 F_1 n_1^2}{A_1 F_0 n_0^2}$$

where,  $A$  is the absorbance at the excitation wavelength,  $F$  is the photoluminescence intensity,  $n$  is the refractive index of the solvent, and the subscripts 1 and 0 represent the sample and the standard.

### **Reactive oxygen species generation measurement *in vitro***

The reactive oxygen species (ROS) generation measurement of **DMPpy**, **DPpy**, **DMPSI** in buffer solution (1/99: DMSO/ PBS) under white light irradiation (10 mW·cm<sup>-2</sup>) was detected using 2',7'-dichlorodihydrofluorescein diacetate (DCFH-DA) as a commercial probe. DCFH-DA was hydrolyzed to DCFH for testing. The concentration of DCFH was 2 μM and the concentration of phenazine-based photosensitizers was 10 μM. The fluorescence increase of DCFH-DA at 520 nm was recorded at different irradiation time to obtain the ascent rate of the photosensitizing process.

The Singlet oxygen (<sup>1</sup>O<sub>2</sub>) generation measurement of **DMPpy** in buffer solution (1/99: DMSO/ PBS) under white light irradiation (10 mW·cm<sup>-2</sup>) was detected using 9,10-Anthracenediyl-bis(methylene)dimalonic Acid (ABDA) as a commercial probe. The concentration of ABDA was 100 μM and the concentration of **DMPpy** was 10 μM. The fluorescence decrease of ABDA at 380 nm was recorded at different irradiation time to obtain the ascent rate of the photosensitizing process.

The superoxide radicals (O<sub>2</sub><sup>-</sup>) generation measurement of **DMPpy** in buffer solution (1/99: DMSO/ PBS) under white light irradiation (30 mW·cm<sup>-2</sup>) was detected using dihydrorhodamine123 (DHR123) as a commercial probe. The concentration of DHR123 was 10 μM and the concentration of **DMPpy** was 10 μM. The fluorescence increase of DHR123 at 530 nm was recorded at different irradiation time to obtain the ascent rate of the photosensitizing process.

The hydroxyl radicals (·OH) generation measurement of **DMPpy** in buffer solution (1/99: DMSO/ PBS) under white light irradiation (30 mW·cm<sup>-2</sup>) was detected

using 5,5-Dimethyl-1-pyrroline N-oxide (DMPO) as the  $\cdot\text{OH}$  indicator in ESR measurement. Samples were prepared by mixing 10  $\mu\text{L}$ , 1 mM of **DMPpy**, in water and 25  $\mu\text{L}$  of DMPO (100 mM) in water, respectively. EPR signals were recorded by adding samples through a capillary tube under a white light irradiation at  $30 \text{ mW}\cdot\text{cm}^{-2}$  for 1 minutes.

### **Theoretical Calculation**

Methodology: Geometry optimizations were carried out on the molecules in the vacuum phase, using the software Avogadro to enter the starting geometry. The molecules were distorted to form various conformations, and then the global minimum of the potential energy surface was found through structural optimization. Frequency calculations were performed on the optimized geometry to distinguish whether they are in a minimum state or a transition state on the potential energy surface. Finally, in the transition state structure, the bond length and bond angle were distorted in the vibration direction, and the structure was re-optimized until only positive frequencies were obtained. All calculations were performed using the Gaussian 16 program<sup>3</sup> with the (TD)M06-2X-D3 function<sup>4</sup> and the standard 6-311G (d,p) basic settings in the Gaussian 16 program.<sup>5</sup>

### **Cell Culture**

Hela cell line was provided by Feringa Nobel Prize Scientists Joint Research Center, East China University of Science and Technology. The culture media contain 10% fetal bovine serum (FBS) and 1% penicillin-streptomycin (PS). All cells were cultured in an incubator at  $37 \text{ }^\circ\text{C}$  with humidified environment containing 5%  $\text{CO}_2$ .

### **Cellular Imaging**

Cells were seeded in confocal cell dishes and cultured in the incubator. When the cell confluence reached around 70%, fresh culture medium containing **DMPpy** (10  $\mu\text{M}$ ) was added into the cell dishes. After incubation for 1 h, cells were washed with  $1\times$  PBS

and co-stained for 30 min with Mito Tracker Green (2  $\mu\text{M}$ ), BODIPY 505/515 (5  $\mu\text{g}\cdot\text{mL}^{-1}$ ) or Lyso Tracker Green (. Afterward, cells were washed with  $1\times$  PBS and taken for confocal fluorescence imaging (Nikon A1R). The excitation laser was at 490 nm and the emissions were collected within 500-530 nm for commercial fluorophores. The excitation laser was at 490 nm and the emissions were collected within 650-750 nm for **DMPpy**. The Pearson's correlation coefficient was calculated by ImageJ.

### **Cytotoxicity of DMPpy in cells under normoxia and hypoxia**

The HeLa cells were planted in 96-well plate (5000 per well) for 16 h, and another 8 h under normoxic (21 %  $\text{O}_2$ ) or hypoxic (8 % and 1 %  $\text{O}_2$ ) atmosphere. After 24 h, the **DMPpy** at different concentrations was added and continued to incubate 4 h under normoxic (21 %  $\text{O}_2$ ) or hypoxic (8 % and 1 %  $\text{O}_2$ ) atmosphere. After that, the cell culture media was replaced with 100  $\mu\text{L}$  fresh medium. Subsequently, the cells were irradiated upon white light for 0-20 min ( $30\text{ mW}\cdot\text{cm}^{-2}$ ). After irradiation, the cells were again incubated for 12 h. Then, 100  $\mu\text{L}$  CCK-8 solution ( $0.1\text{ mg}\cdot\text{mL}^{-1}$ ) in DMEM was added to each well. After 4 h of incubation, the absorbance value of each well was recorded with a microplate reader at 450 nm. The cell viability rate was calculated by the following equation:

The cytotoxicity was evaluated by Cell Counting Kit 8 (CCK-8) assays. Cells were seeded in 96-well plates and cultured in standard 0.2 mL DMEM medium containing 10% FBS (Invitrogen, Calsbad, CA, USA) and 1% antibiotics (penicillin,  $10000\text{ U}\cdot\text{mL}^{-1}$ , streptomycin  $10\text{ mg}\cdot\text{mL}^{-1}$ ) for 24 h ( $37\text{ }^\circ\text{C}$ , 5%  $\text{CO}_2$ ). For the *in vitro* dark cytotoxicity study, HeLa cells were seeded in 96-well plates ( $1\times 10^4$  cells per well) and cultured overnight. Fresh culture media containing varied concentrations of **DMPpy** were added into the cell wells and incubated for 24 h. Afterward, fresh culture medium was added into the cell dishes after washing with  $1\times$  PBS for three times. For the *in vitro* phototoxicity study, the HeLa cells were then treated with various concentrations (0-32  $\mu\text{M}$ ) of **DMPpy** in the dark for 24 h and then irradiated for 0-10 min. The white light irradiation source intensity was  $30\text{ mW}\cdot\text{cm}^{-2}$ . After incubation, absorbance was measured on a multifunctional microplate reader (Synergy H1, BioTek Instruments,



America) at 450 nm. The relative cell survival rate (%) was calculated by the following formula: cell survival rate =  $(OD_{\text{treated}}/OD_{\text{control}}) \times 100\%$ . Each concentration of **DMPpy** contained 6 cell wells.

### **Intracellular ROS detection.**

2',7'-dichlorodihydrofluorescein diacetate (DCFH-DA) was employed as the intracellular ROS indicator, which can be converted to DCFH and emits bright green fluorescence in the presence of ROS. HeLa cells were planted onto 35 mm confocal dishes at a density of  $1 \times 10^5$  cells and cultured for 24 h at 37 °C under 5% CO<sub>2</sub>. The cells were then incubated with 10 μM **DMPpy** for 4 h. After rinse with PBS, the cells were incubated with 1 μM DCFH-DA for another 30 min. The cells were washed with PBS and exposed to irradiation for 10 min with white light (30 mW·cm<sup>-2</sup>). After irradiation, confocal fluorescence imaging was used to observe the intracellular ROS level. The excitation wavelength for DCF was 488 nm and emission wavelength collected from 500 nm to 550 nm. In order to simulate hypoxic environment (8% and 1% O<sub>2</sub>), Anaero Pack-Anaero and Anaero Pack-Micro Aero (Mitsubishi Gas Chemical Company, Japan) were used. HeLa cells were planted onto 35 mm confocal dishes at a density of  $1 \times 10^5$  cells and cultured for 16 h under normoxic condition, and then the cells were incubated for another 8 h at 37 °C under hypoxic. Other operations were same to that in normoxic condition.

### **Intracellular O<sub>2</sub><sup>-</sup> detection.**

The detection of O<sub>2</sub><sup>-</sup> was performed using the similar procedure described for the detection of ROS, except that DHE (10 μM) was used as the O<sub>2</sub><sup>-</sup> probe. The red fluorescence signal of cells was collected by CLSM.

### **Calcein-AM/PI staining of HeLa cells.**

HeLa cells were planted onto 35 mm confocal dishes at a density of  $1 \times 10^5$  cells for 24 h at 37 °C under 5% CO<sub>2</sub>. HeLa cells incubated with different following treatments: group 1, untreated; group 2, incubated with 10 μM **DMPpy** for 4 h followed

by white light at a light dose of  $30 \text{ mW} \cdot \text{cm}^{-2}$  for 0-20 min. Before imaging, each group was stained with  $2 \mu\text{M}$  Calcein-AM and  $8 \mu\text{M}$  PI for 30 min. Then the fluorescence images of Calcein-AM/PI within HeLa cells were detected using confocal microscopy with the excitation wavelength of 488 nm, capture emission region from 500 nm to 550 nm for green channel, 600-640 nm for red channel.

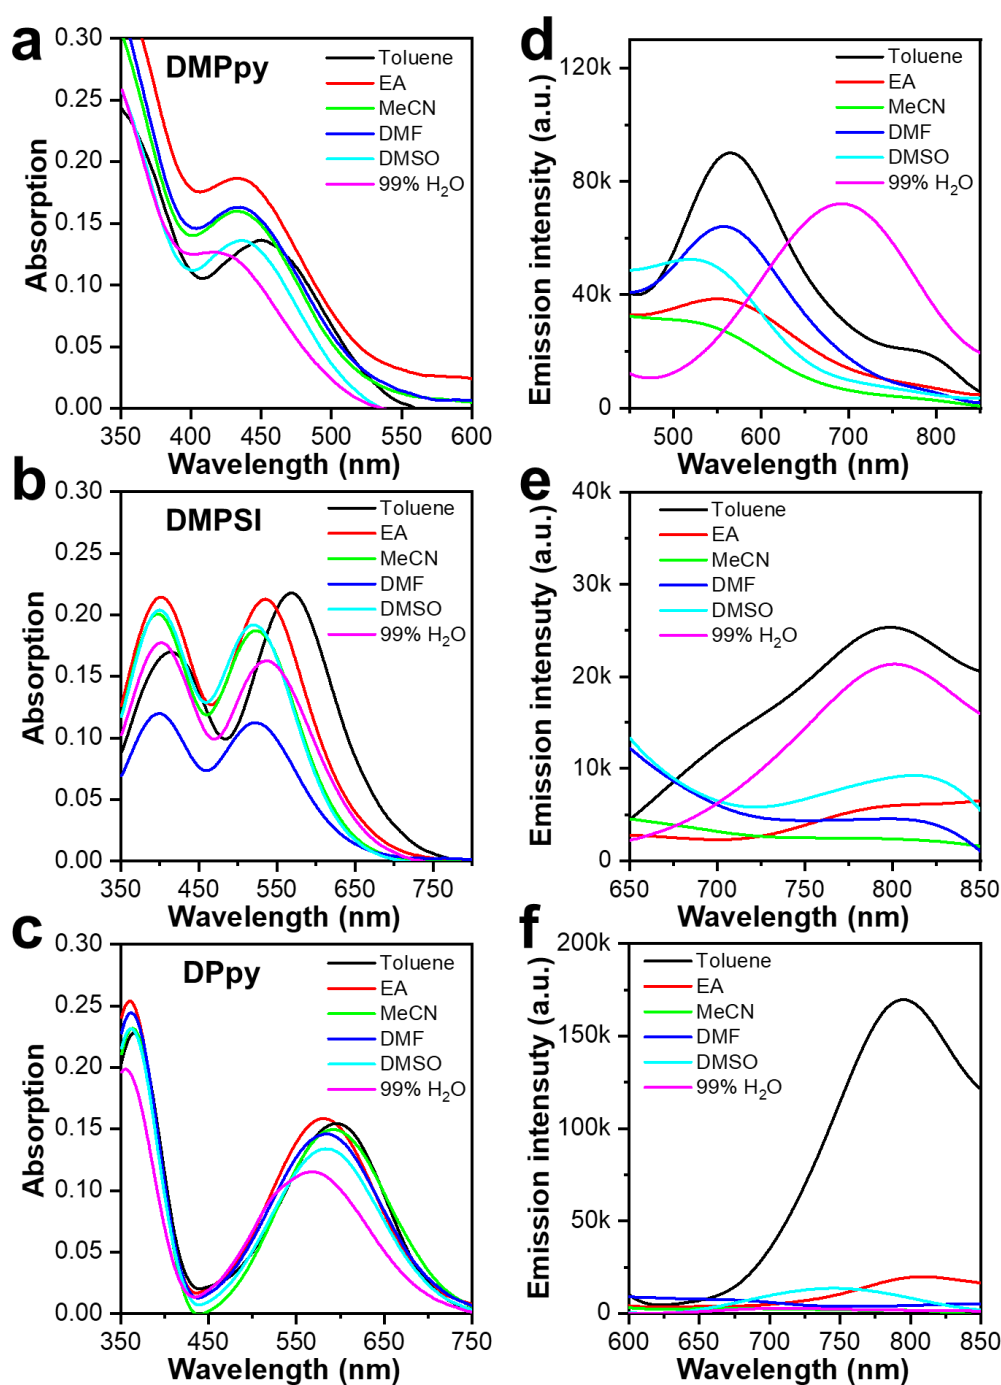

**Fig. S1** The UV absorption and fluorescence spectra of a, d) **DMPpy**; b, e) **DMPSI** and c, f) **DPpy** in different solvents. 99% H<sub>2</sub>O is DMSO/H<sub>2</sub>O = 1:99 (v/v)

**Table S1.** The experimental optical characteristics for the titled compounds.<sup>a</sup>

| Dye   | Absorption                               | Emission                                 |            | Stokes shift (cm <sup>-1</sup> ) | Molar Absorption Coefficient                        |
|-------|------------------------------------------|------------------------------------------|------------|----------------------------------|-----------------------------------------------------|
|       | $\lambda_{\text{exp}}$ (nm) <sup>b</sup> | $\lambda_{\text{exp}}$ (nm) <sup>b</sup> | $\eta$ (%) | $E_{\text{exp}}$ <sup>b</sup>    | $\epsilon$ (L·mol <sup>-1</sup> ·cm <sup>-1</sup> ) |
| DMPpy | 430                                      | 700                                      | 4.1        | > 8970                           | 13241                                               |
| DMPSI | 540                                      | 795                                      | 1.2        | > 5523                           | 16263                                               |
| DPpy  | 580                                      | 710                                      | 0.2        | > 3156                           | 11029                                               |

<sup>a</sup>Data were caught in aqueous solution (1/99: DMSO/ H<sub>2</sub>O) in an ordinary temperature.  $\lambda_{\text{exp}}$  = experimental absorption onsets or emission peaks,  $E_{\text{exp}}$  = experimental Stokes shift. <sup>b</sup>The experimental values are obtained from the absorption and the emission peaks.

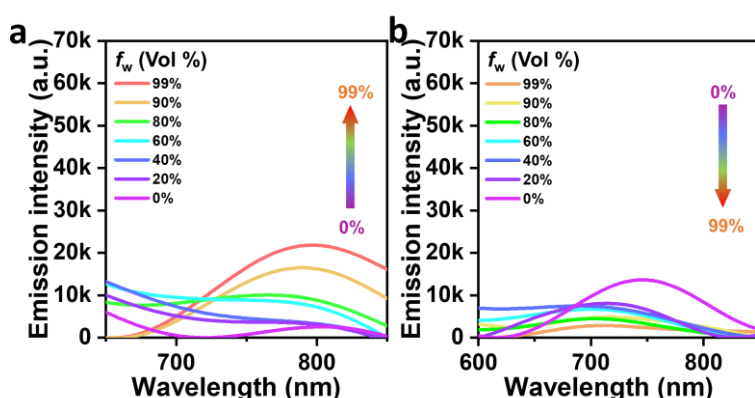

**Fig. S2** PL spectra of (a) DMPSI and (b) DPpy in DMSO/water with different  $f_w$  values.

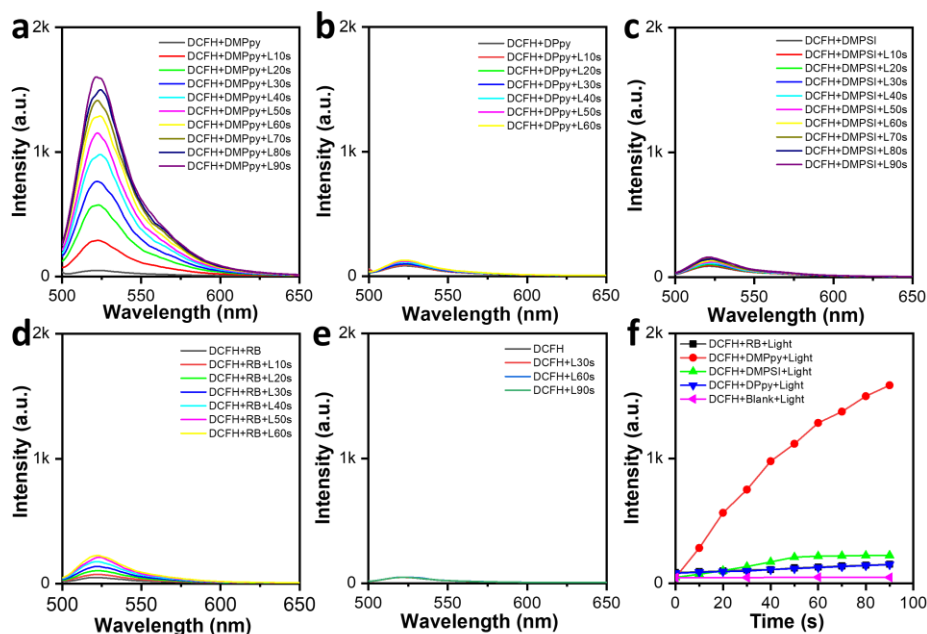

**Fig. S3** PL spectra of DCFH-DA (2  $\mu\text{M}$ ) in the presence of (a) DMPpy, (b) DPpy, (c) DMPSI, (d) RB and (e) blank under the irradiation with different time in DMSO/PBS: (v/v= 1:99). (f) The fluorescence change curves of DCFH-DA under various conditions with different time. Compounds concentration: 10  $\mu\text{M}$ . White light: 30  $\text{mW}\cdot\text{cm}^{-2}$ .

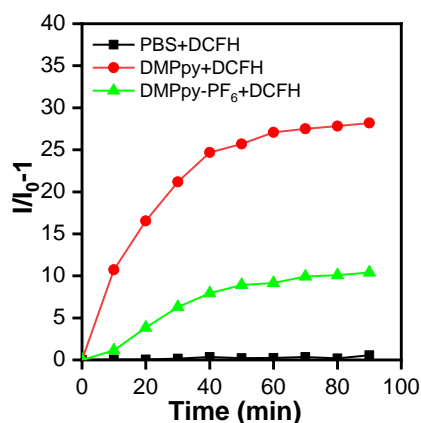

**Fig. S4** Plot of the relative emission intensity ( $I/I_0-1$ ) of the DCFH ( $2 \mu\text{M}$ ) solution containing **DMPpy** or **DMPpy-PF<sub>6</sub>** ( $10 \mu\text{M}$ ) versus the irradiation time. Compounds concentration:  $10 \mu\text{M}$ . White light:  $30 \text{ mW}\cdot\text{cm}^{-2}$ .

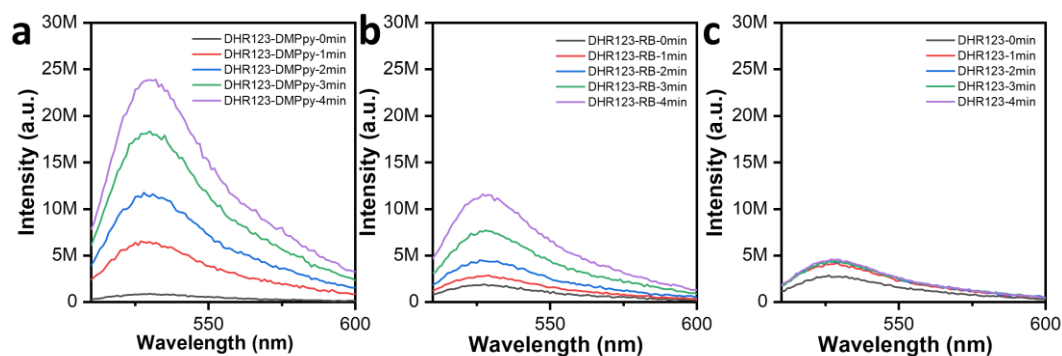

**Fig. S5** PL spectra of DHR 123 ( $10 \mu\text{M}$ ) in the presence of (a) **DMPpy**, (b) **RB**, (c) blank under the irradiation with different time in DMSO/PBS: ( $v/v = 1:99$ ). Compounds concentration:  $10 \mu\text{M}$ . White light:  $30 \text{ mW}\cdot\text{cm}^{-2}$ .

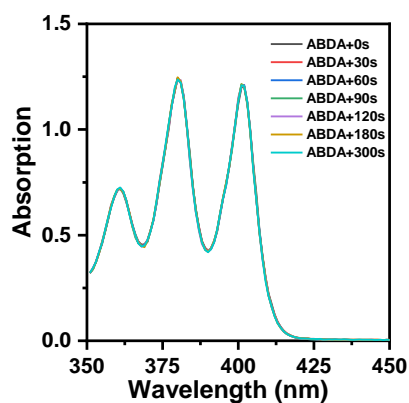

**Fig. S6** UV-vis spectra of ABDA under the irradiation with different time in DMSO/PBS ( $v/v = 1/99$ ). White light:  $30 \text{ mW}\cdot\text{cm}^{-2}$ .

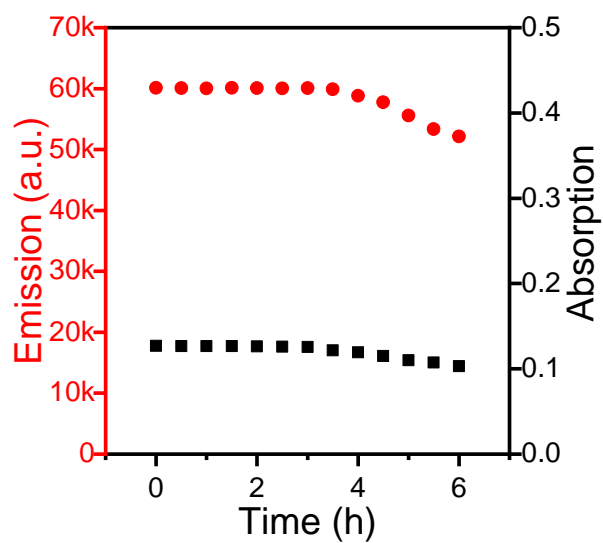

**Fig. S7** Photostability of the **DMPpy** under white light irradiation with different time in DMSO/PBS (v/v = 1/99). White light: 30 mW·cm<sup>-2</sup>.

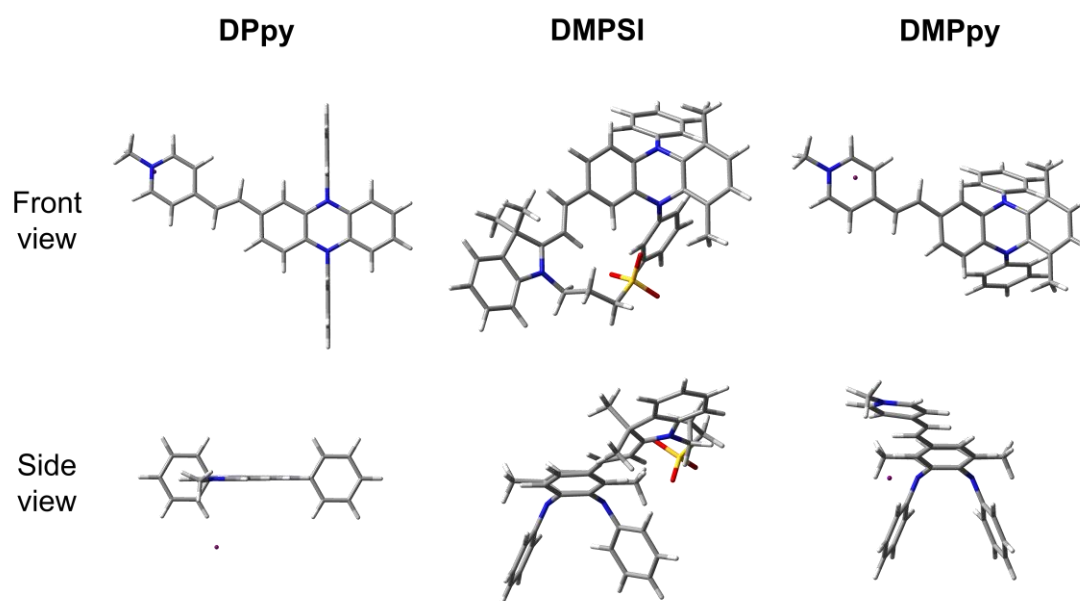

**Fig. S8** Full optimized  $S_0$  structures of **DPpy**, **DMPSI** and **DMPpy** from two perspectives, calculated at the M06-2X-D3/6-311G(d,p) level.

## Biological Experiments

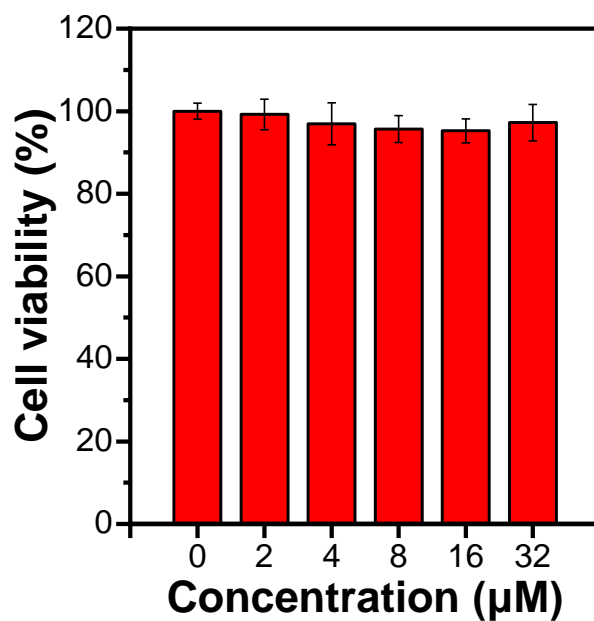

**Fig. S9** Relative viabilities of 293T cells after incubation with various concentrations of **DMPpy** for 24 h in dark.

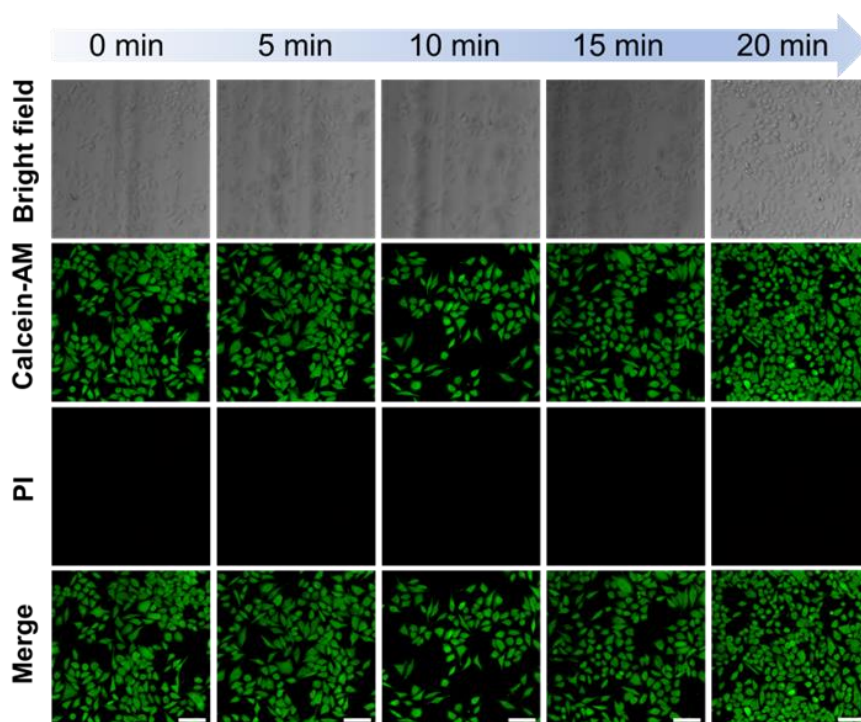

**Fig. S10** CLSM images of HeLa cells costained with Calcein-AM/PI incubated with PBS after irradiation for 0-20 min under normoxia (21 %  $\text{O}_2$ ). [PI] = 1  $\mu\text{M}$ ,  $E_x = 488 \text{ nm}$ ,  $E_m = 600 - 650 \text{ nm}$ ; [Calcein-AM] = 1  $\mu\text{M}$ ,  $E_x = 488 \text{ nm}$ ,  $E_m = 500 - 560 \text{ nm}$ . White light: 30  $\text{mW} \cdot \text{cm}^{-2}$ . Scale bar = 100  $\mu\text{m}$ .

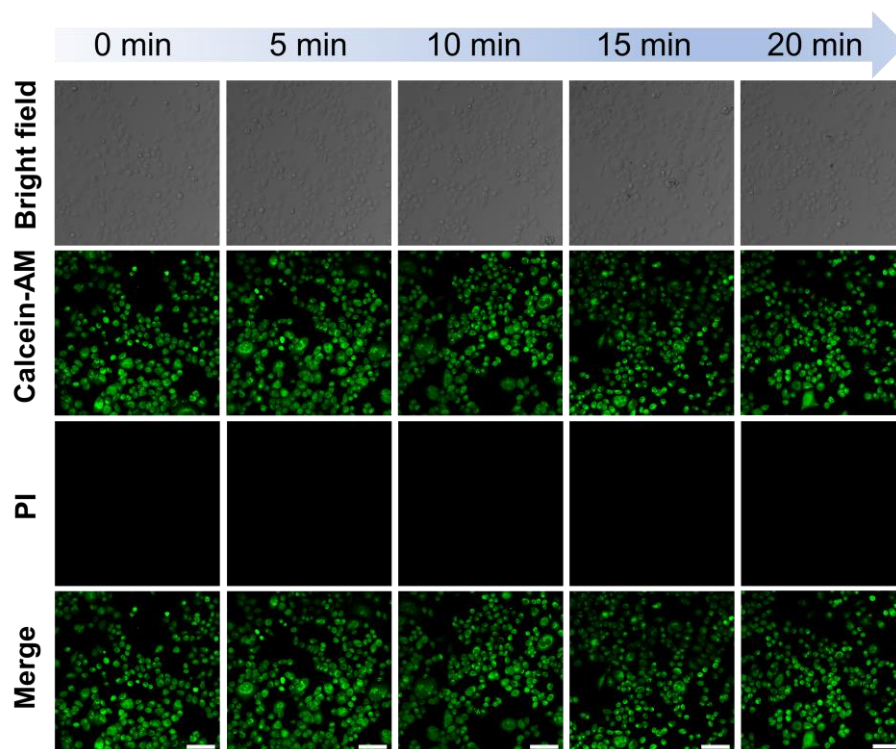

**Fig. S11** CLSM of HeLa cells costained with Calcein-AM/PI incubated with PBS after irradiation for 0-20min under hypoxia (8 % O<sub>2</sub>). [PI] = 1 μM , E<sub>x</sub> = 488 nm, E<sub>m</sub> = 600 – 650 nm; [Calcein-AM] = 1 μM, E<sub>x</sub> = 488 nm, E<sub>m</sub> = 500 – 560nm. White light: 30 mW·cm<sup>-2</sup>. Scale bar = 100 μm.

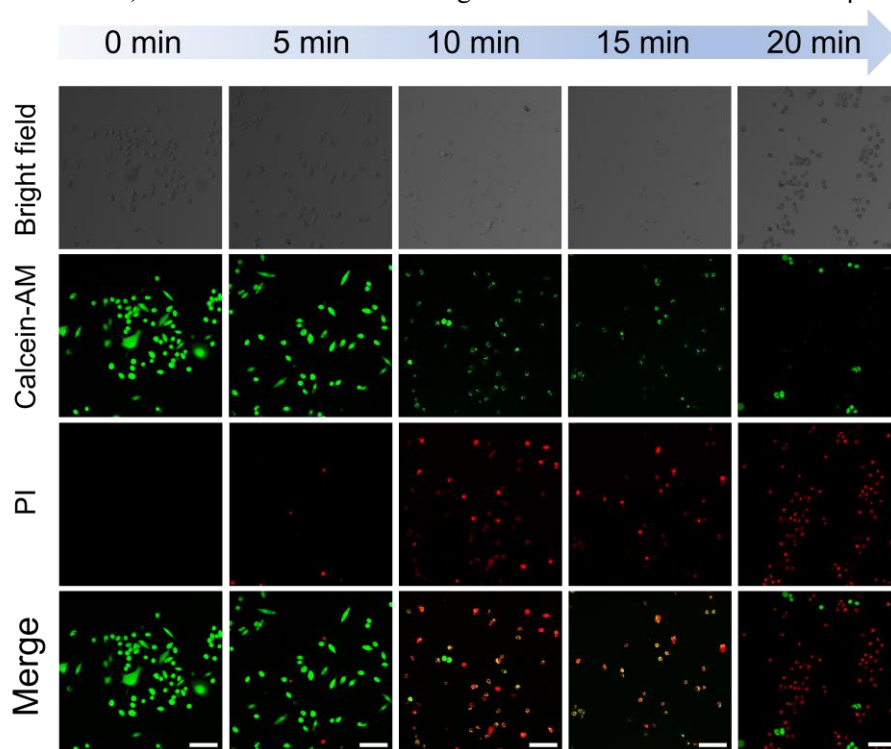

**Fig. S12** CLSM images of HeLa cells costained with Calcein-AM/PI incubated with **DMPpy** after irradiation for 0-20min under hypoxia (1 % O<sub>2</sub>). [PI] = 1 μM , E<sub>x</sub> = 488 nm, E<sub>m</sub> = 600 – 650 nm; [Calcein-AM] = 1 μM, E<sub>x</sub> = 488 nm, E<sub>m</sub> = 500 – 560 nm. White light: 30 mW·cm<sup>-2</sup>. Scale bar = 100 μm.

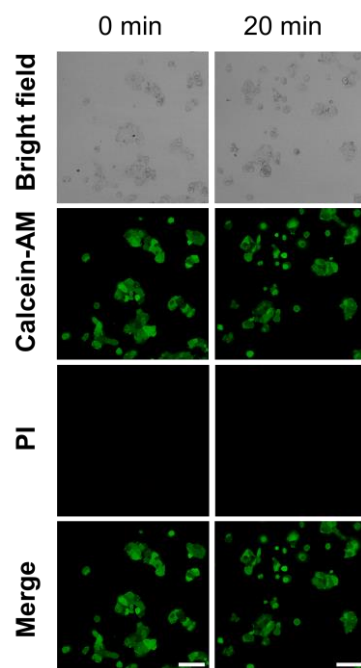

**Fig. S13** CLSM images of MCF-7 cells costained with Calcein-AM/PI incubated with PBS after irradiation for 0 and 20 min under hypoxia (1 % O<sub>2</sub>). [PI] = 1 μM, E<sub>x</sub> = 488 nm, E<sub>m</sub> = 600 – 650 nm; [Calcein-AM] = 1 μM, E<sub>x</sub> = 488 nm, E<sub>m</sub> = 500 – 560 nm. White light: 30 mW·cm<sup>-2</sup>. Scale bar = 100 μm.

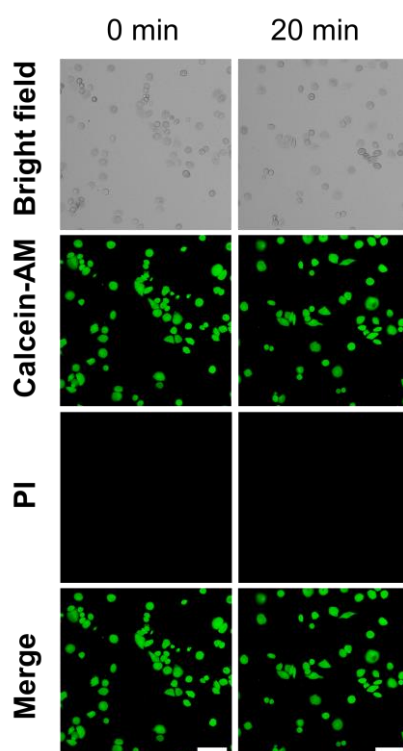

**Fig. S14** CLSM images of A549 cells costained with Calcein-AM/PI incubated with PBS after irradiation for 0-20 min under hypoxia (1 % O<sub>2</sub>). [PI] = 1 μM, E<sub>x</sub> = 488 nm, E<sub>m</sub> = 600 – 650 nm; [Calcein-AM] = 1 μM, E<sub>x</sub> = 488 nm, E<sub>m</sub> = 500 – 560 nm. White light: 30 mW·cm<sup>-2</sup>. Scale bar = 100 μm.



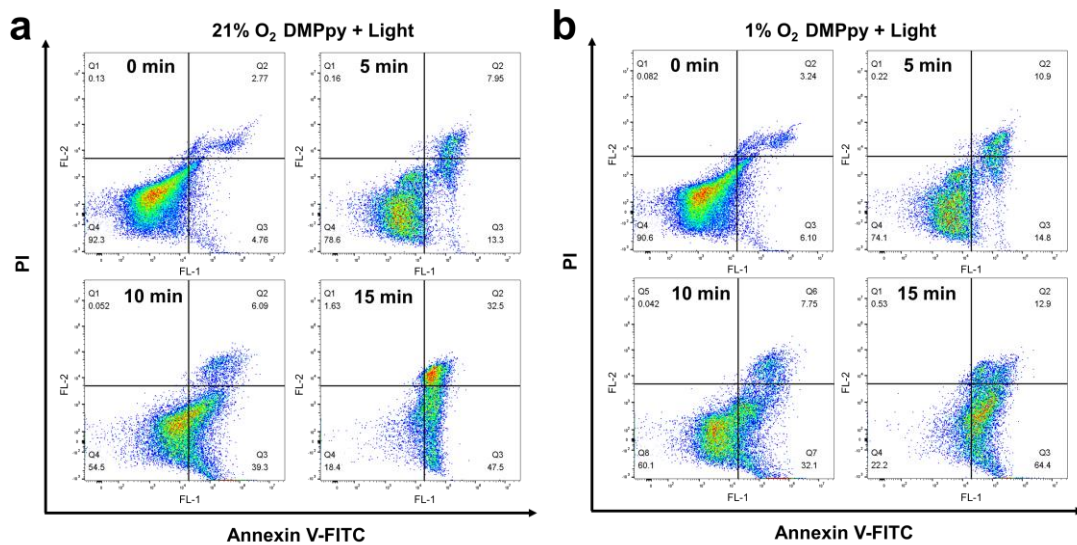

**Fig. S15** Flow cytometry profiles for HeLa cells treated with **DMPpy** under (a) 21% O<sub>2</sub> or (b) 1% O<sub>2</sub>, irradiated for different periods and stained with Annexin V-FITC and PI. White light: 30 mW·cm<sup>-2</sup>. [DMPpy] = 10 μM

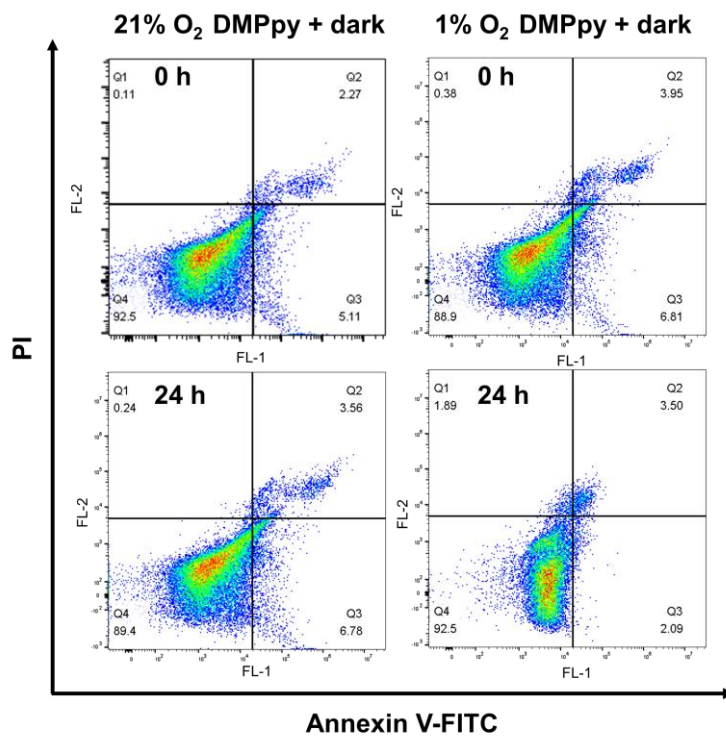

**Fig. S16** Flow cytometry profiles for HeLa cells treated with **DMPpy** under 21% O<sub>2</sub> or 1% O<sub>2</sub>, in dark for 24 h and stained with Annexin V-FITC and PI. [DMPpy] = 10 μM.

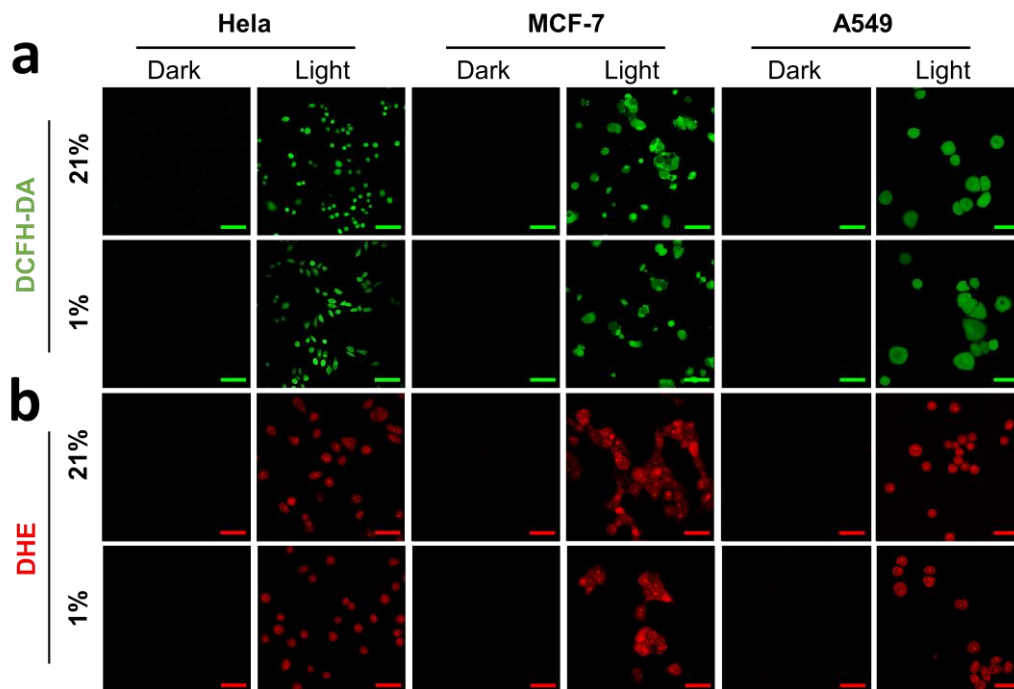

**Fig. S17** (a) CLSM images of three types of cells stained with DCFH-DA + DMPpy in normoxia (21 % O<sub>2</sub>) and extremely hypoxia (1 % O<sub>2</sub>) under dark or light for 10min; (b) CLSM images of three types of cells stained with DHE + DMPpy in normoxia (21 % O<sub>2</sub>) and extremely hypoxia (1 % O<sub>2</sub>) under dark or light for 10min; [DCFH-DA] = 10  $\mu$ M, Ex = 488 nm, Em = 500–530 nm; [DHE] = 10  $\mu$ M, Ex = 488 nm, Em = 590–630 nm. White light: 30 mW·cm<sup>-2</sup>. Scale bar = 50  $\mu$ m.

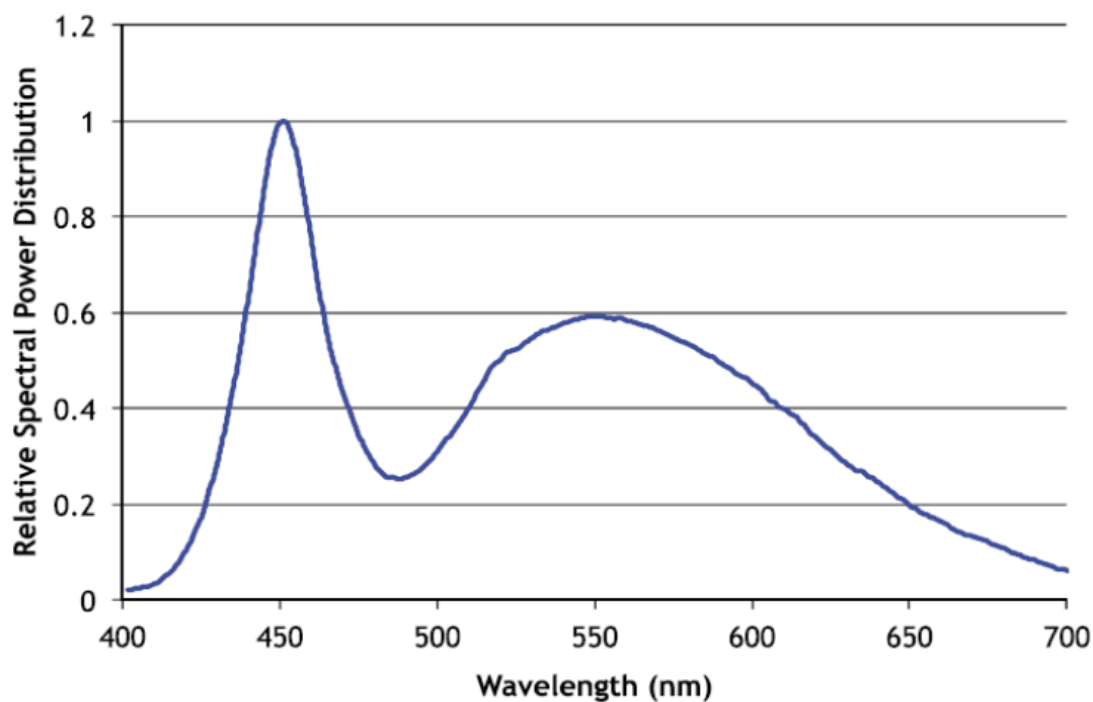

**Fig. S18** White spectrum of the light source S5000.

## Original Spectral Copy of New Compounds

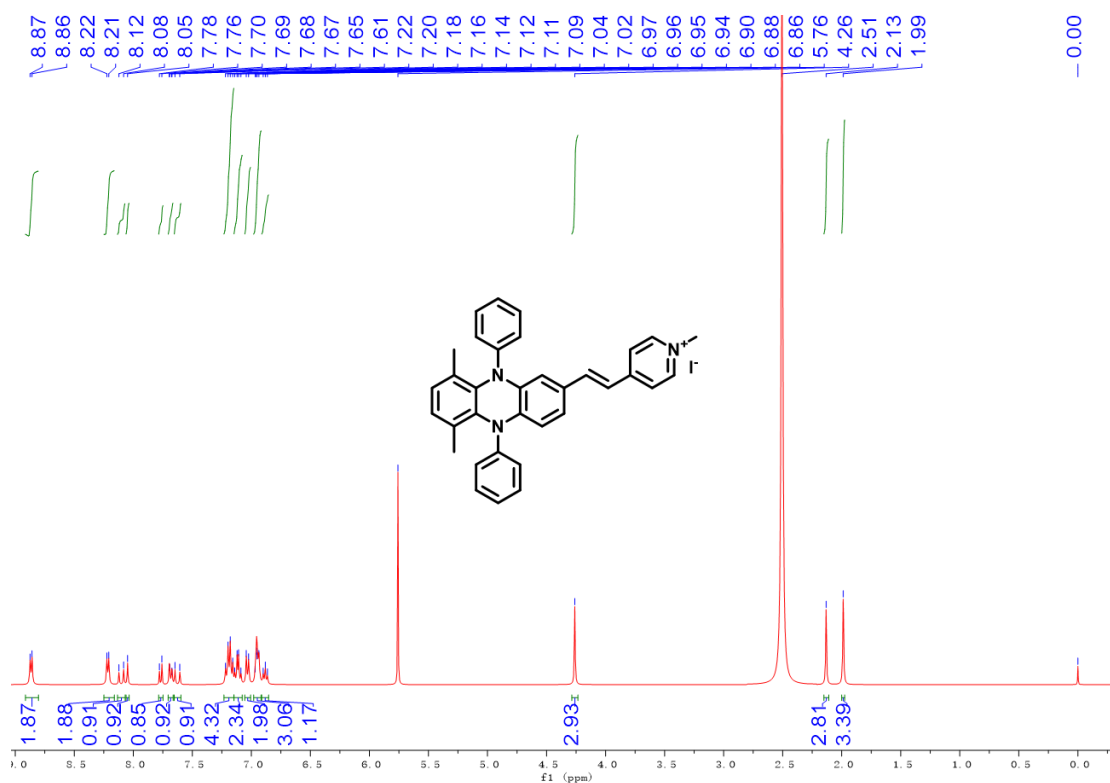

**Fig. S19** <sup>1</sup>H NMR spectrum of DMPpy in DMSO-d<sub>6</sub>.

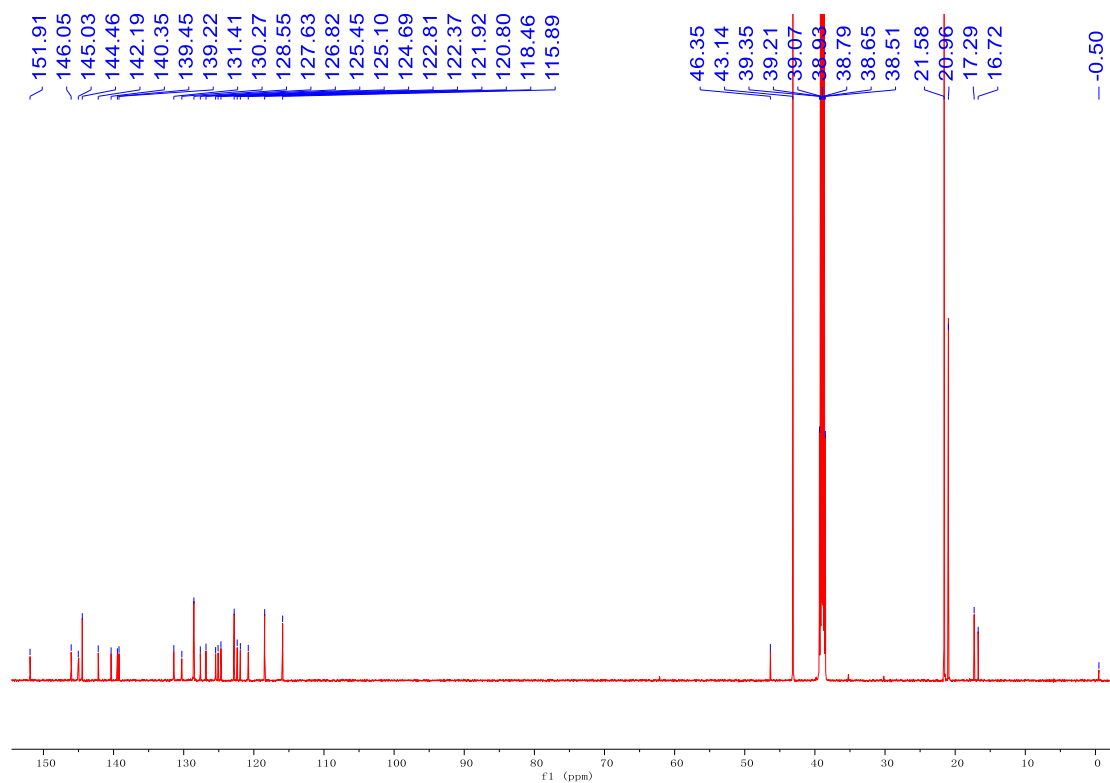

**Fig. S20** <sup>13</sup>C NMR spectrum of DMPpy in DMSO-d<sub>6</sub>.

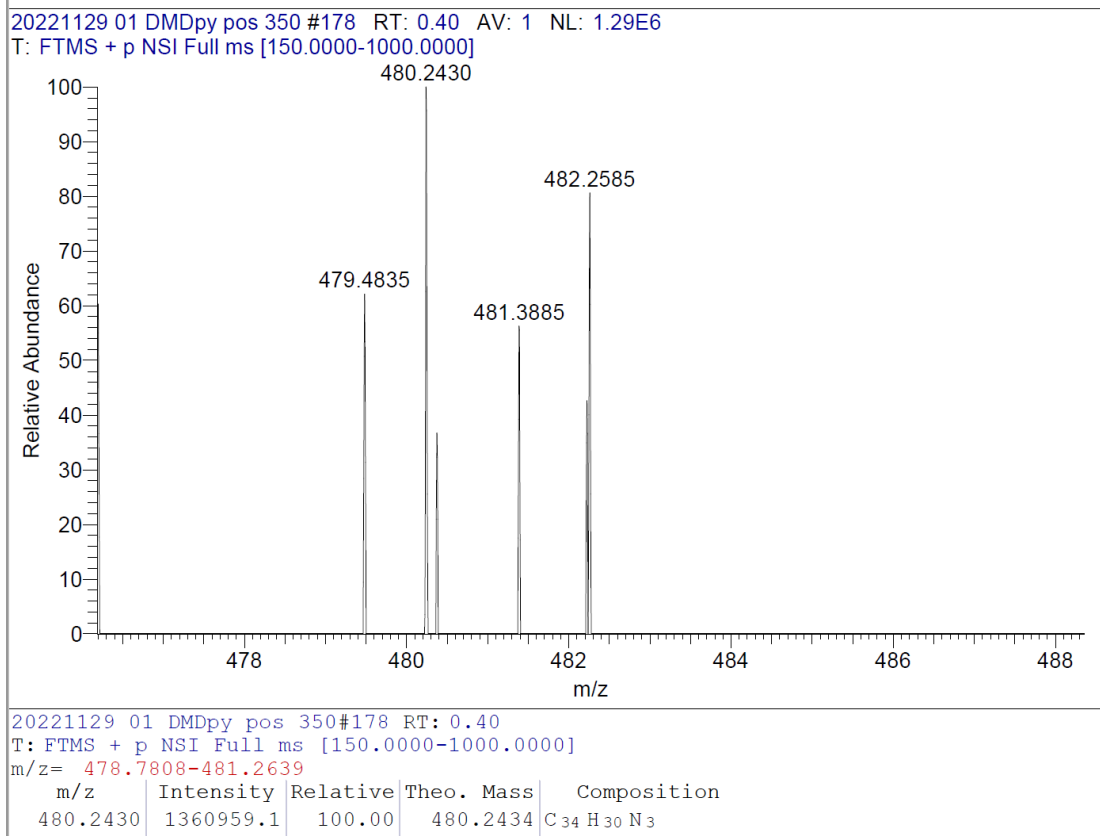

**Fig. S21** High resolution mass spectrum of compound **DMPpy**.

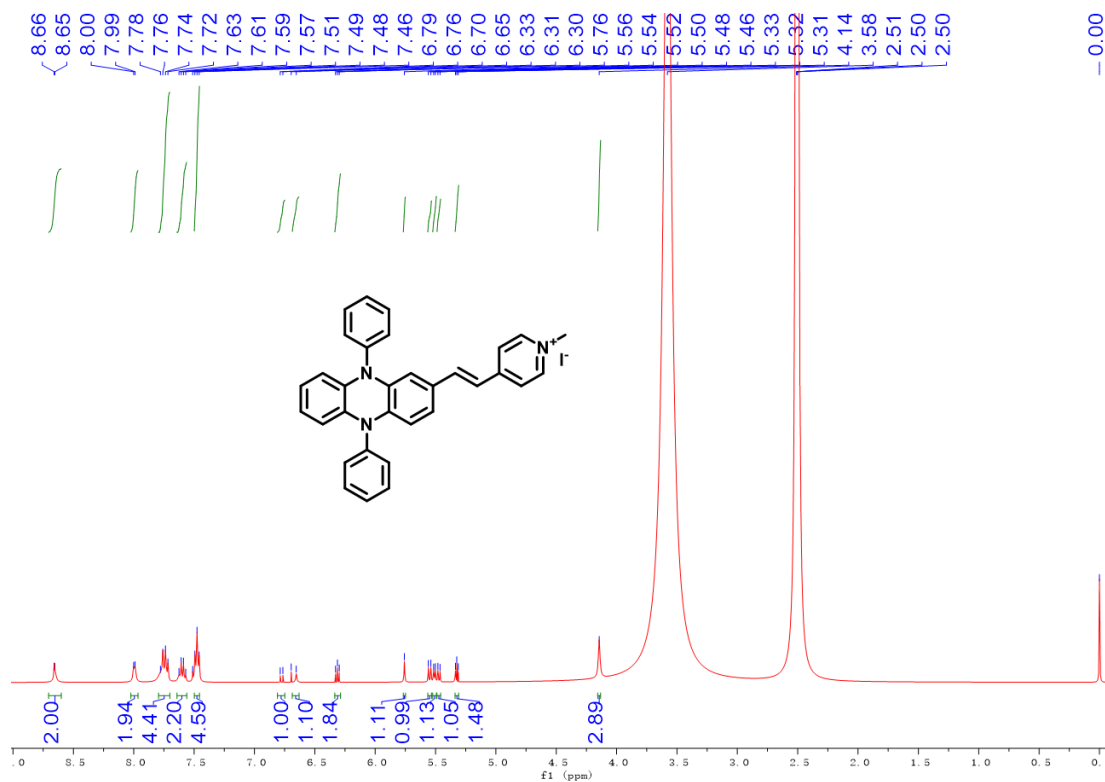

**Fig. S22** <sup>1</sup>H NMR spectrum of **DMPpy** in DMSO-d<sub>6</sub>.

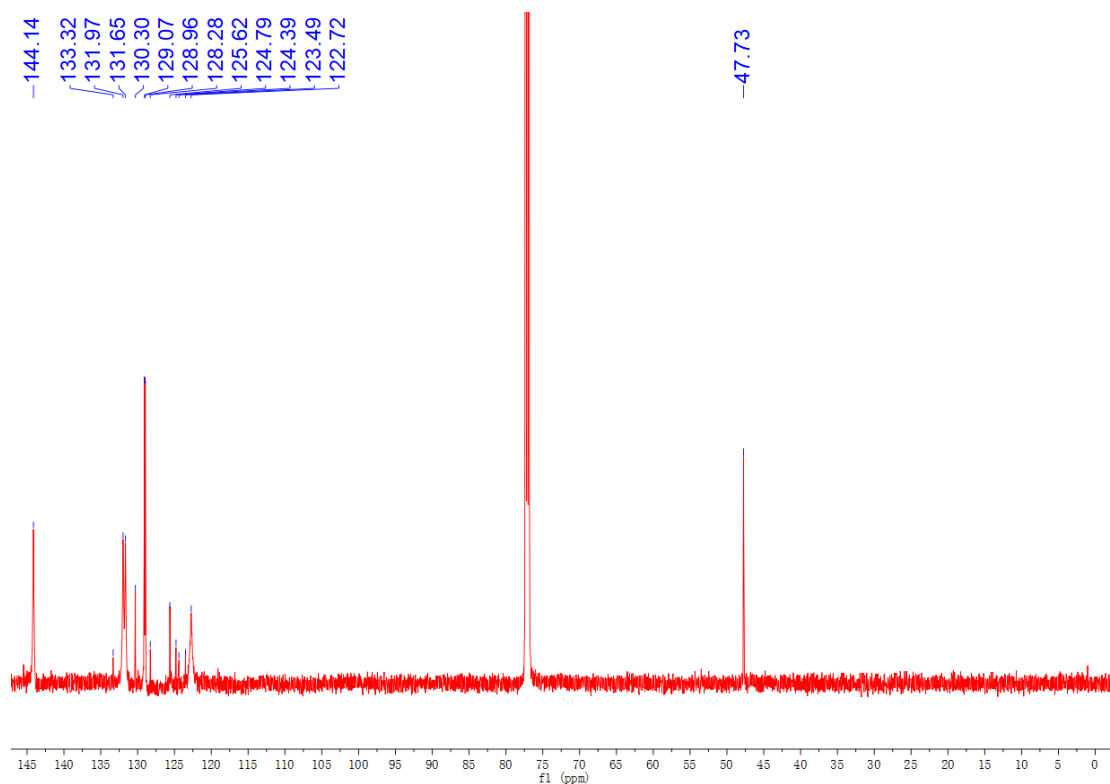

Fig. S23  $^{13}\text{C}$  NMR spectrum of **DPpy** in  $\text{CDCl}_3$ .

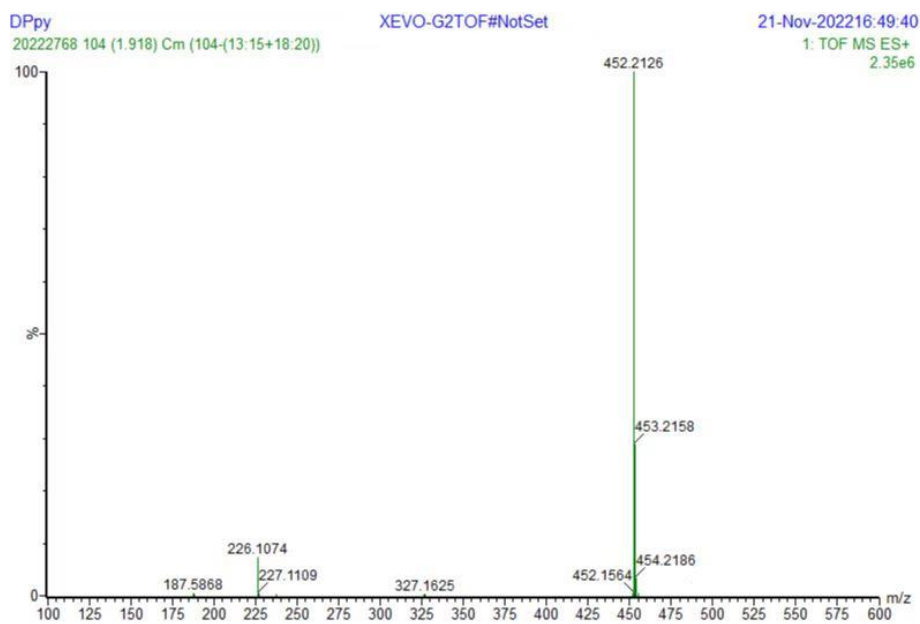

Fig. S24 High resolution mass spectrum of compound **DPpy**.

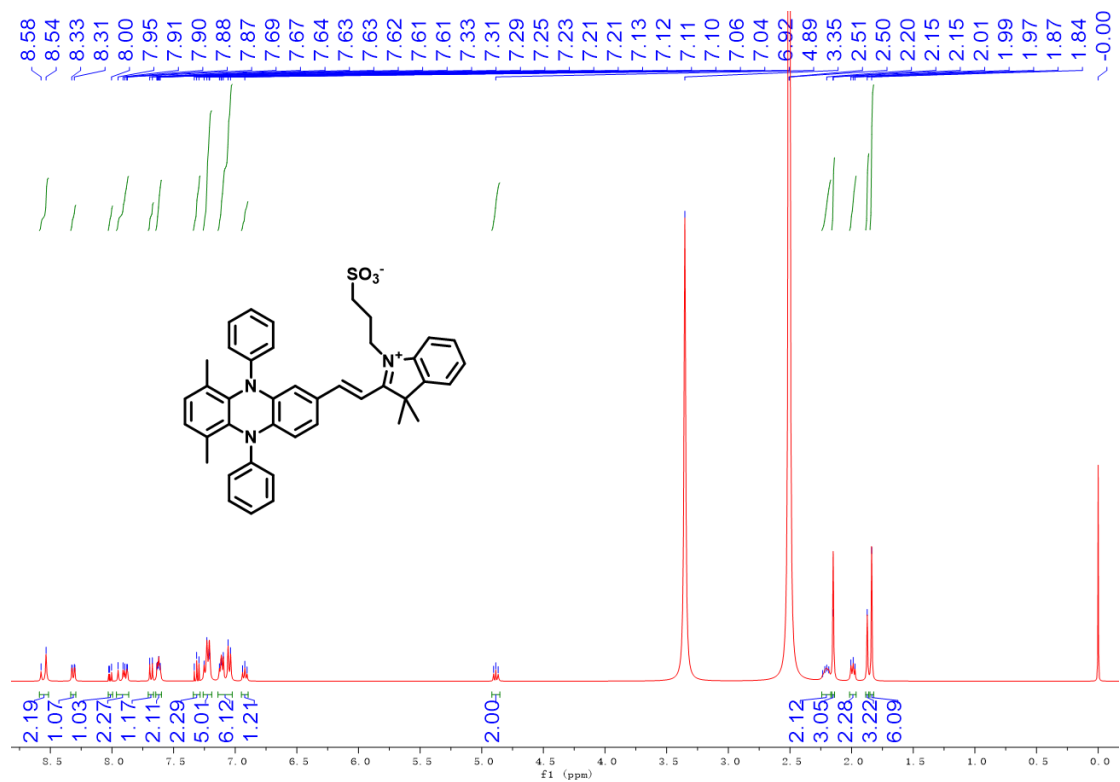

Fig. S25 <sup>1</sup>H NMR spectrum of DMPSI in DMSO-d<sub>6</sub>.

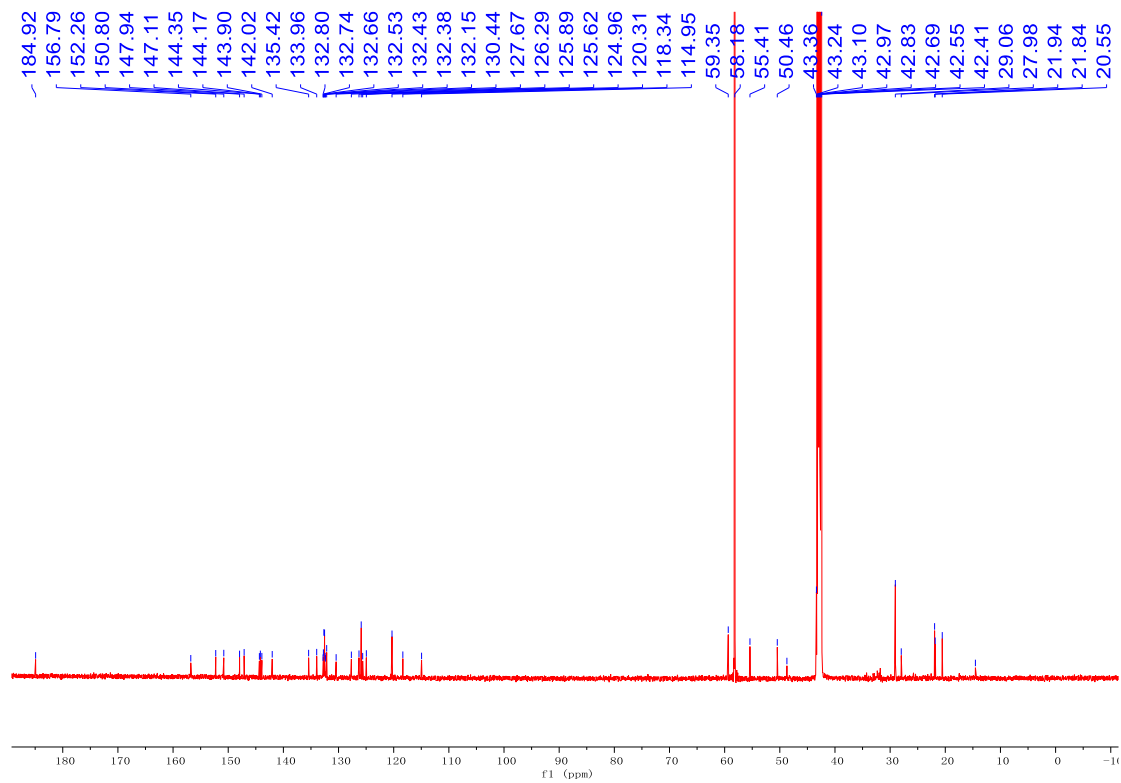

Fig. S26 <sup>13</sup>C NMR spectrum of DMPSI in DMSO-d<sub>6</sub>.

## Single Mass Analysis

Tolerance = 5.0 PPM / DBE: min = -1.5, max = 50.0

Element prediction: Off

Number of isotope peaks used for i-FIT = 3

Monoisotopic Mass, Even Electron Ions

45 formula(e) evaluated with 1 results within limits (up to 50 closest results for each mass)

Elements Used:

C: 0-41 H: 0-39 N: 0-3 O: 0-3 S: 0-1 Na: 0-1

JIANLI-HUA  
HL-LSF-A12 110 (1.255)1: TOF MS ES+  
3.14e+002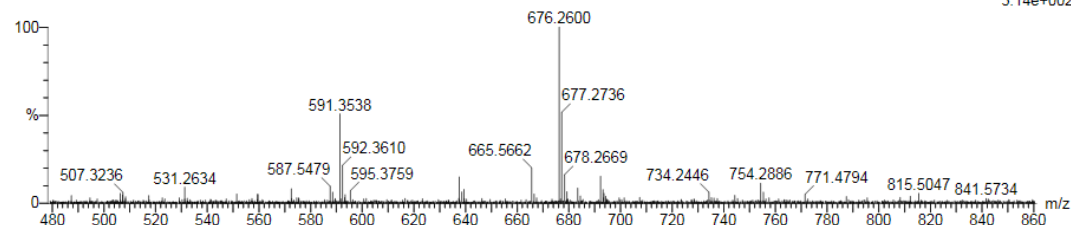

Minimum:

Maximum: 5.0 5.0 -1.5

| Mass     | Calc. Mass | mDa  | PPM  | DBE  | i-FIT | i-FIT (Norm) | Formula            |
|----------|------------|------|------|------|-------|--------------|--------------------|
| 676.2600 | 676.2610   | -1.0 | -1.5 | 23.5 | 38.4  | 0.0          | C41 H39 N3 O3 S Na |

Fig. S27 High resolution mass spectrum of compound DMPSI.

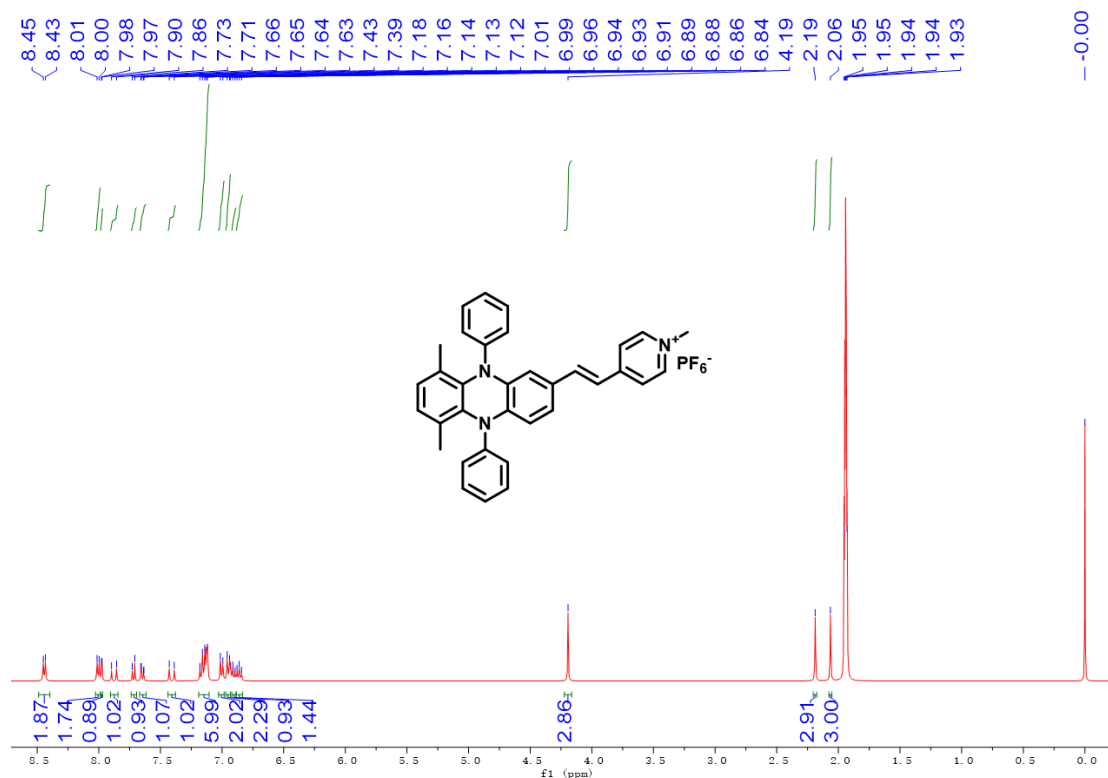Fig. S28 <sup>1</sup>H NMR spectrum of DMPpy-PF<sub>6</sub> in CD<sub>3</sub>CN.

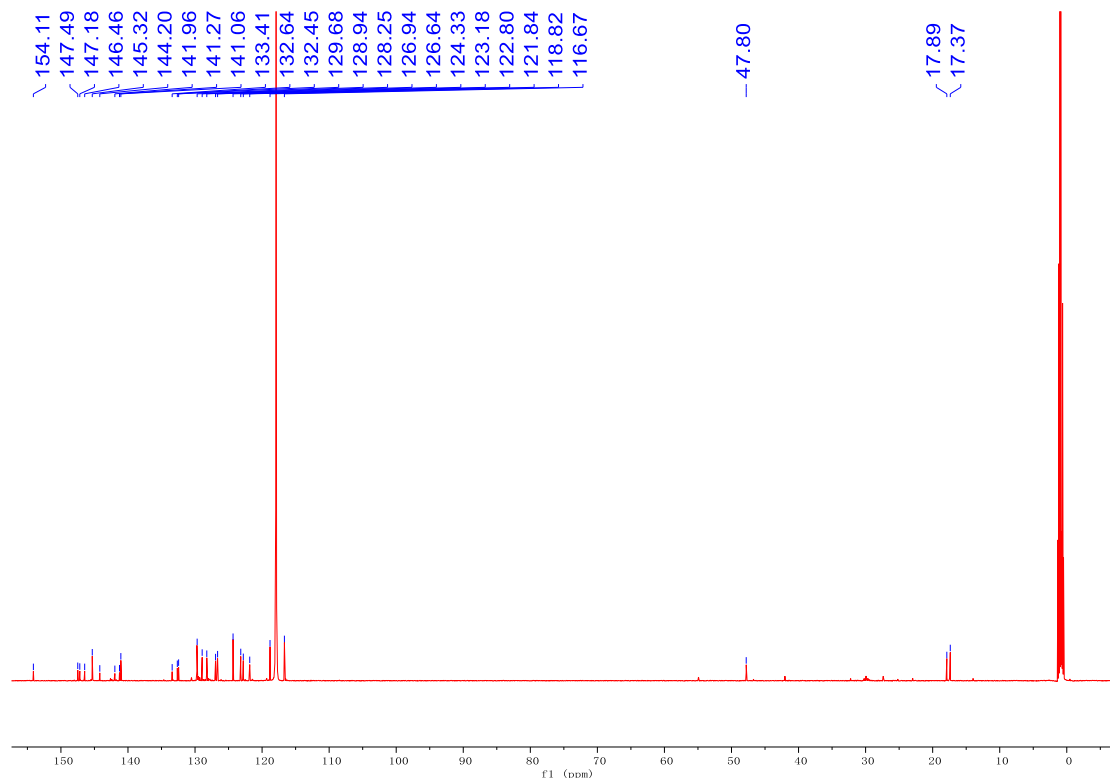

**Fig. S29**  $^{13}\text{C}$  NMR spectrum of **DMPpy-PF<sub>6</sub>** in  $\text{CD}_3\text{CN}$ .

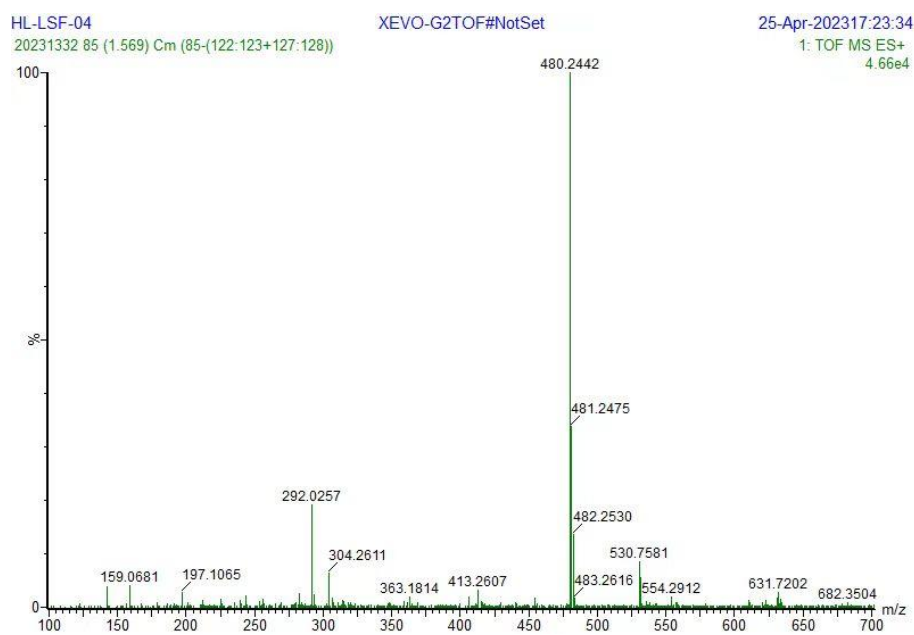

**Fig. S30** High resolution mass spectrum of compound **DMPpy-PF<sub>6</sub>**.



## Reference

1. S. Li, M. He, X. Jin, W. Geng, C. Li, X. Li, Z. Zhang, J. Qian and J. Hua, *Chemistry of Materials*, 2022, **34**, 5999–6008.
2. R. F. Kubin and A. N. Fletcher, *Journal of Luminescence*, 1982, **27**, 455–462.
3. M. J. T. Frisch, G. W.; Schlegel, H. B.; Scuseria, G. E.; Robb, M. A.; Cheeseman, J. R.; Scalmani, G.; Barone, V.; Petersson, G. A.; Nakatsuji, H.; Li, X.; Caricato, M.; Marenich, A. V.; Bloino, J.; Janesko, B. G.; Gomperts, R.; Mennucci, B.; Hratchian, H. P.; Ortiz, J. V.; Izmaylov, A. F.; Sonnenberg, J. L.; Williams; Ding, F.; Lipparini, F.; Egidi, F.; Goings, J.; Peng, B.; Petrone, A.; Henderson, T.; Ranasinghe, D.; Zakrzewski, V. G.; Gao, J.; Rega, N.; Zheng, G.; Liang, W.; Hada, M.; Ehara, M.; Toyota, K.; Fukuda, R.; Hasegawa, J.; Ishida, M.; Nakajima, T.; Honda, Y.; Kitao, O.; Nakai, H.; Vreven, T.; Throssell, K.; Montgomery Jr., J. A.; Peralta, J. E.; Ogliaro, F.; Bearpark, M. J.; Heyd, J. J.; Brothers, E. N.; Kudin, K. N.; Staroverov, V. N.; Keith, T. A.; Kobayashi, R.; Normand, J.; Raghavachari, K.; Rendell, A. P.; Burant, J. C.; Iyengar, S. S.; Tomasi, J.; Cossi, M.; Millam, J. M.; Klene, M.; Adamo, C.; Cammi, R.; Ochterski, J. W.; Martin, R. L.; Morokuma, K.; Farkas, O.; Foresman, J. B.; Fox, D. J. *Gaussian Wallingford, CT*, 2016.
4. Y. Zhao and D. G. Truhlar, *Theoretical Chemistry Accounts*, 2007, **120**, 215–241.
5. S. Grimme, J. Antony, S. Ehrlich and H. Krieg, *J. Chem. Phys.*, 2010, **132**, 154104.
